# Supplementary material for: Probing plasmon-induced surface reactions using two-dimensional correlation vibrational spectroscopy
Source: Royal Society of Chemistry journal article supplement (doi:10.1039/d2cp05705k), 2023-01-01
Supplement: d2cp05705k1.pdf [file d2cp05705k1.pdf]

## Probing Plasmon-Induced Surface Reactions Using Two-Dimensional Correlation Vibrational Spectroscopy

Ruchi Singh<sup>a</sup>, Vikas Yadav<sup>a</sup>, Soumik Siddhanta<sup>a\*</sup>

<sup>a</sup>Department of Chemistry, Indian Institute of Technology Delhi, Hauz Khas, New Delhi- 110016, India.

\*E-mail: soumik@iitd.ac.in

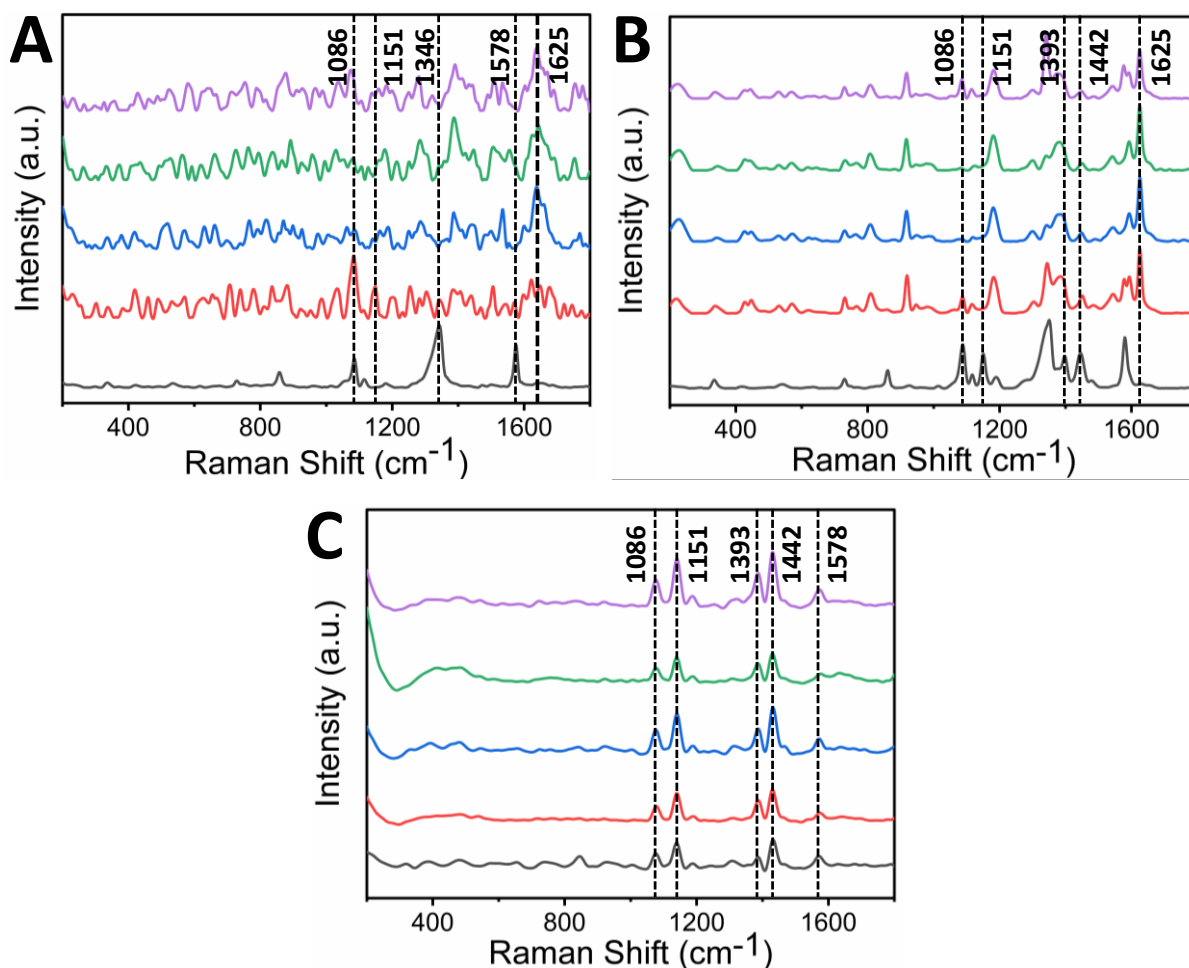

**Figure S1:** SERS spectra of 4-NTP in presence of water with increasing order of concentration (from top to bottom) with different types of nanoparticles (A) AuNPs, (B) Ag@Au core-shell, and (C) AuNFs. 10<sup>-3</sup> M (black), 10<sup>-5</sup> M (red), 10<sup>-7</sup> M (blue), 10<sup>-9</sup> M (green), 10<sup>-11</sup> M (magenta).

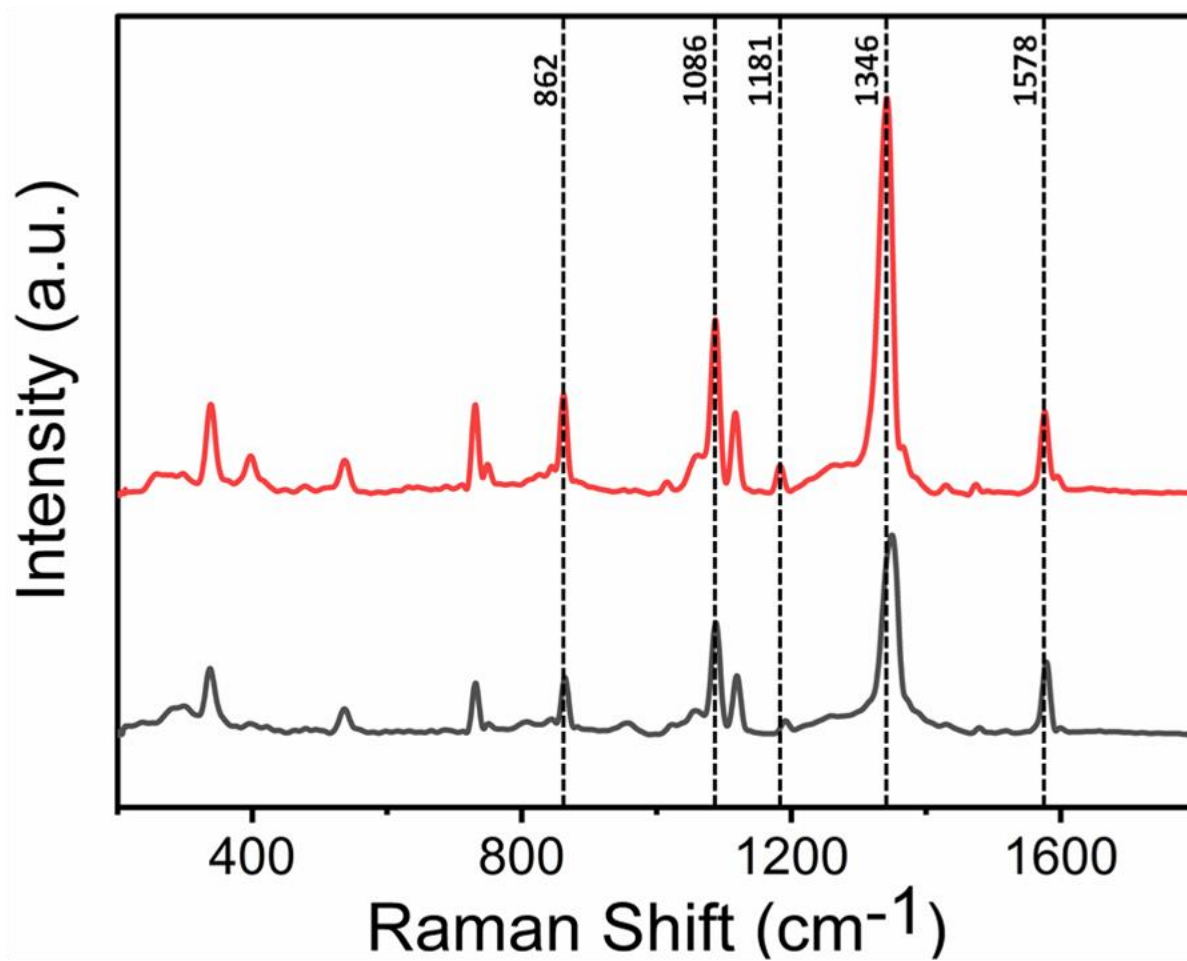

**Figure S2:** SERS spectra of 4-NTP with AgNP (black) and AuNP (red) acquired using 785nm laser at high surface coverage of analyte in wet condition.

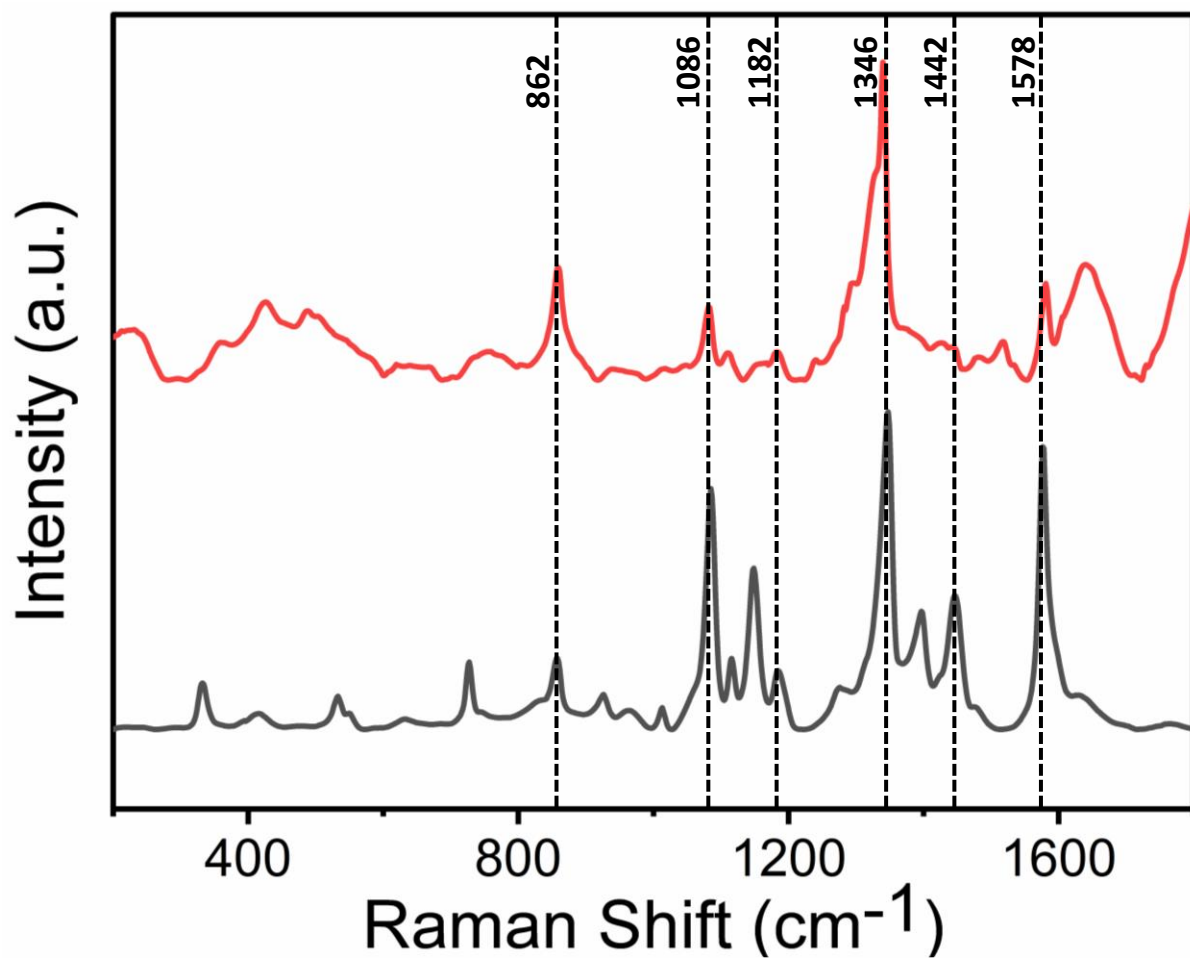

**Figure S3:** SERS spectra of 4-NTP with AgNPs (black) and AuNPs (red) using 532 nm laser with high exposure time in wet condition.

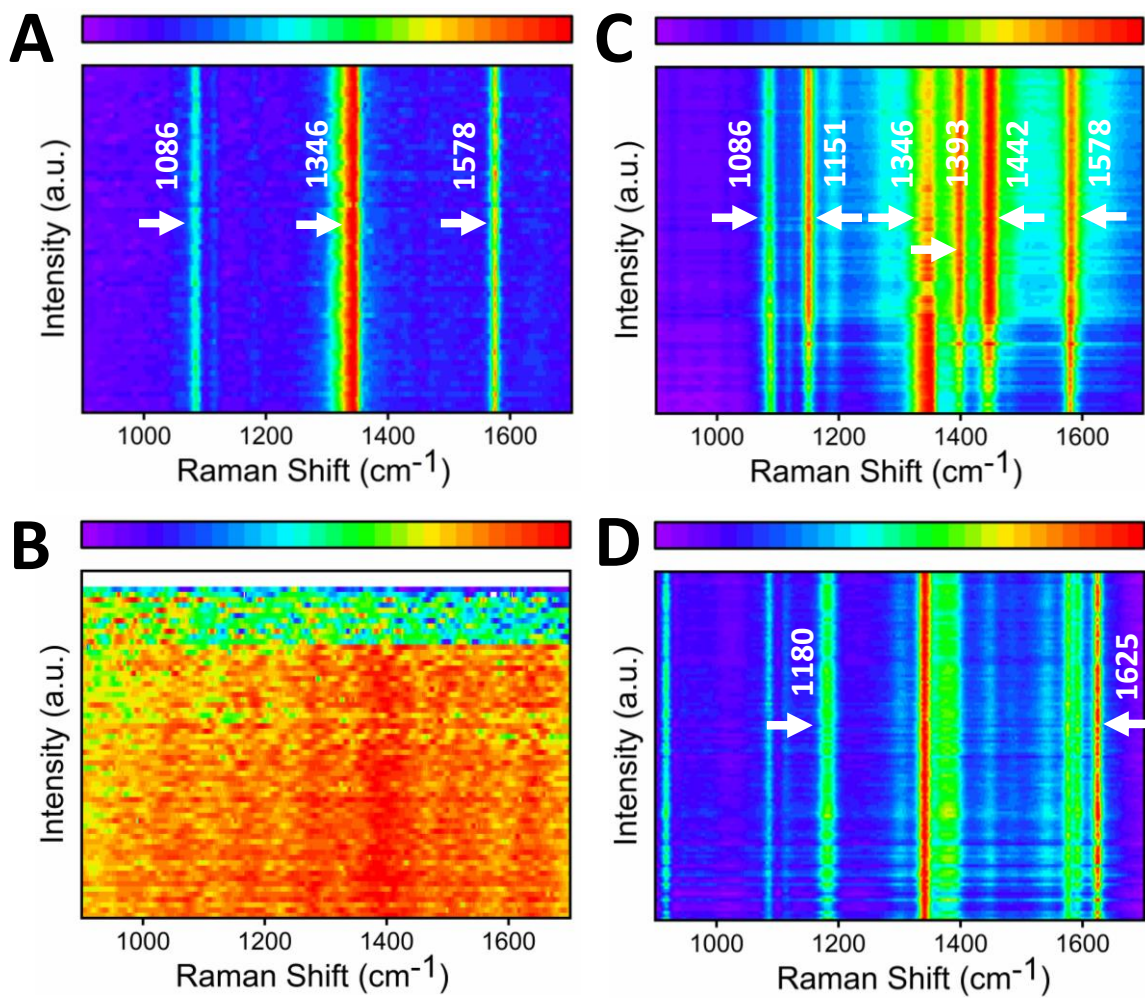

**Figure S4:** Heat map corresponding to time dependent SERS spectra of AuNPs (A) high concentration, (B) low concentration and of Ag@Au core-shell NPs, (C) high concentration, and (D) low concentration.

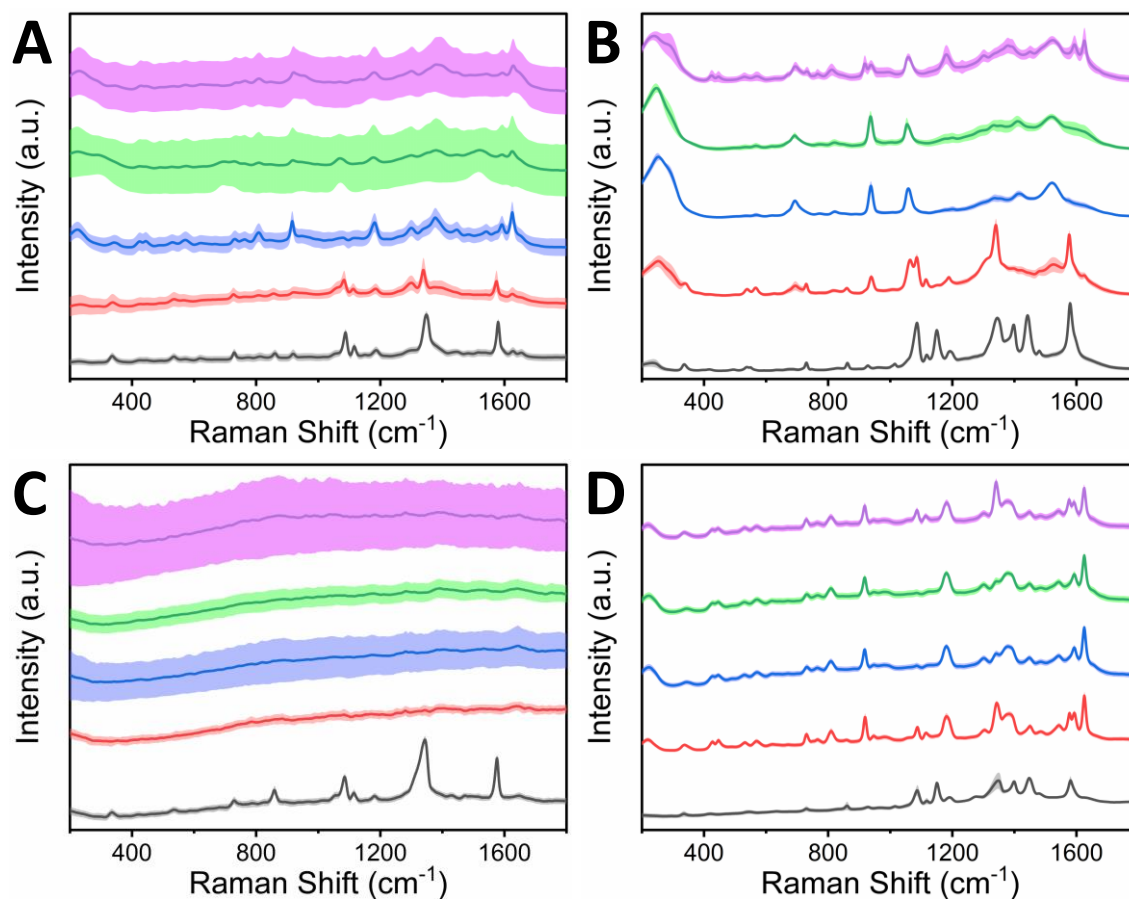

**Figure S5:** Time based average SERS spectra of 4-NTP at different surface coverage of analyte with (A) AgNPs in presence, and (B) absence of water, (C) with AuNPs, and (D) with Ag@Au core-shell nanoparticles. Concentration of analyte in increasing order from top to bottom,  $10^{-3}$  M (black),  $10^{-5}$  M (red),  $10^{-7}$  M (blue),  $10^{-9}$  M (green), and  $10^{-11}$  M. (magenta).

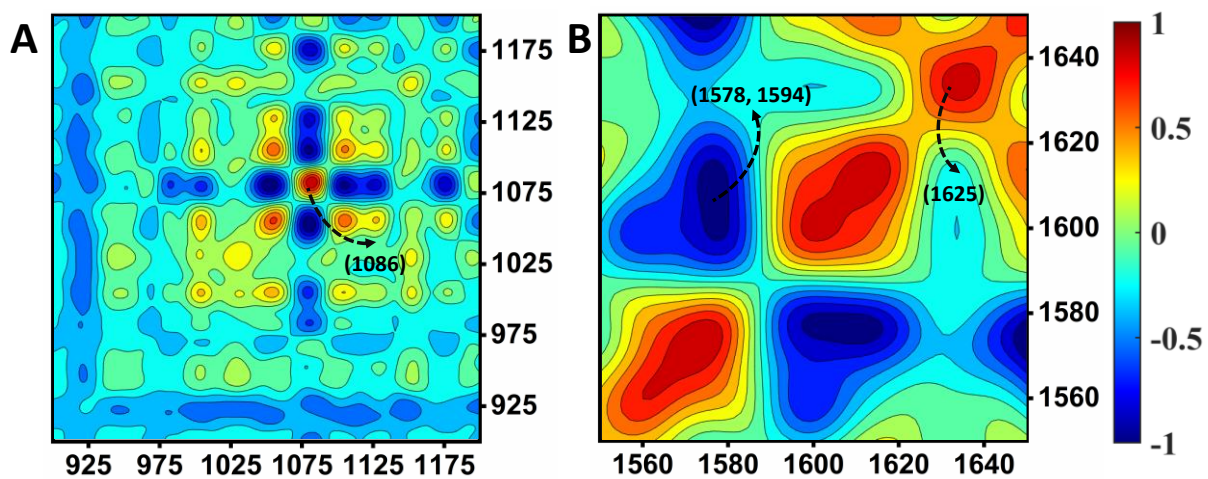

**Figure S6:** Synchronous maps with variable concentration of analyte with AuNPs for the spectral range of (A) 900 -1200  $\text{cm}^{-1}$  and (B) 1550-1650  $\text{cm}^{-1}$ .

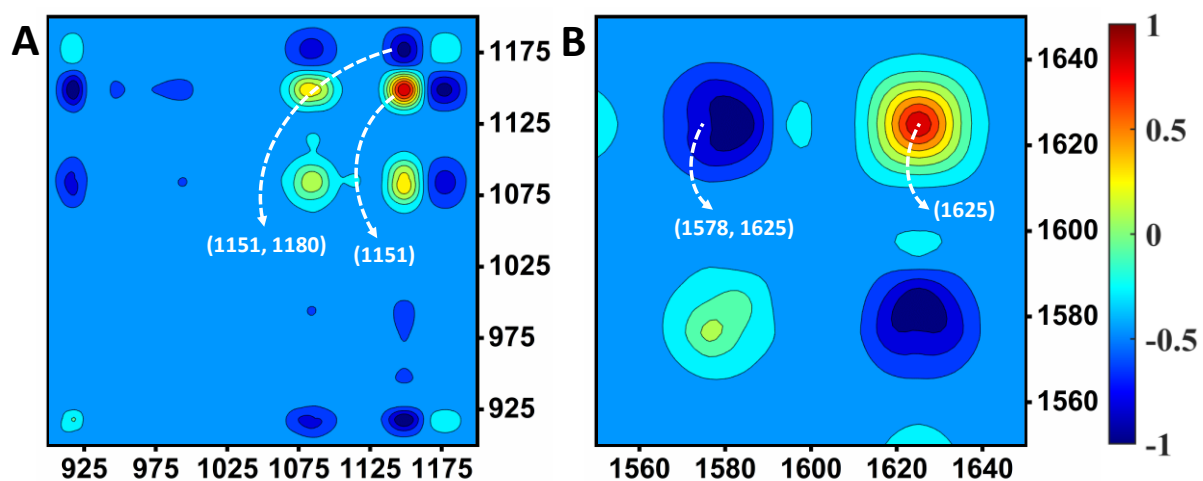

**Figure S7:** Synchronous maps with variable concentration of analyte with Ag@Au core-shell for the spectral range of (A) 900 -1200  $\text{cm}^{-1}$  and (B) 1550-1650  $\text{cm}^{-1}$ .

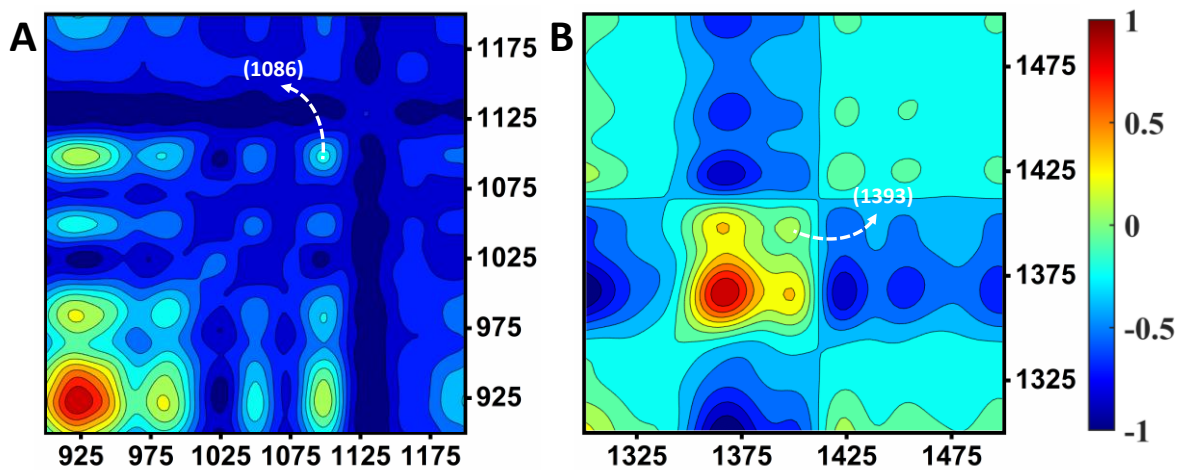

**Figure S8:** Synchronous maps with variable concentration of analyte with AuNFs for the spectral range of (A) 900 -1200  $\text{cm}^{-1}$  and (B) 1300-1500  $\text{cm}^{-1}$ .
